# Supplementary material for: Efficient sensitization of rare-earth-free Mn4+-activated antimonate phosphor: enabling intense far-red emission for agricultural lighting
Source: Royal Society of Chemistry journal article supplement (doi:10.1039/d4tc03734k), 2024-01-01
Supplement: d4tc03734k1.pdf [file d4tc03734k1.pdf]

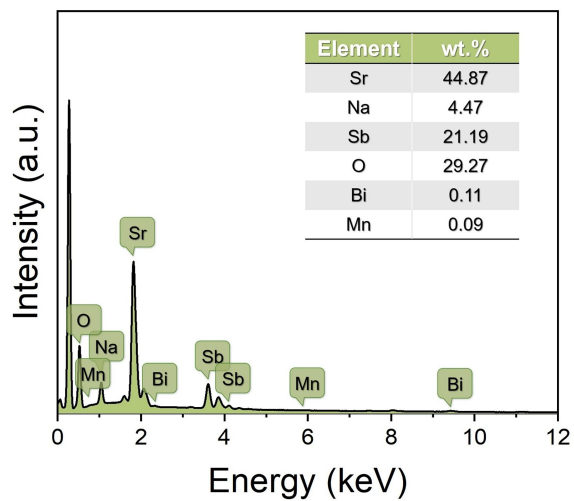

Fig S1. EDS of  $\text{Sr}_3\text{NaSbO}_6:0.001\text{Bi}^{3+},0.007\text{Mn}^{4+}$ .

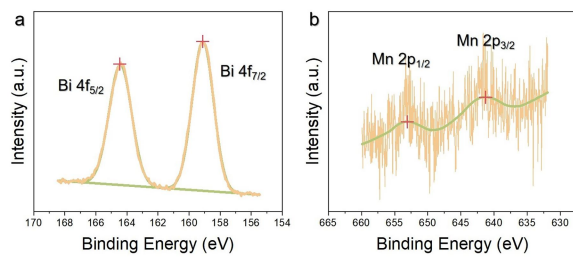

Fig S2. XPS of Bi-4f and Mn-2p in  $\text{Sr}_3\text{NaSbO}_6:0.001\text{Bi}^{3+},0.007\text{Mn}^{4+}$ .

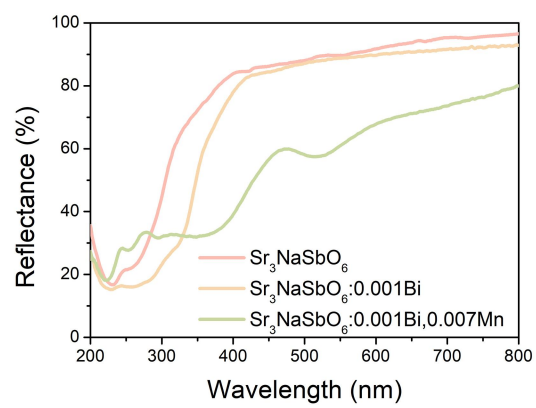

Fig S3. DRS of  $\text{Sr}_3\text{NaSbO}_6$ ,  $\text{Sr}_3\text{NaSbO}_6:0.001\text{Bi}^{3+}$  and  $\text{Sr}_3\text{NaSbO}_6:0.001\text{Bi}^{3+},0.007\text{Mn}^{4+}$ .

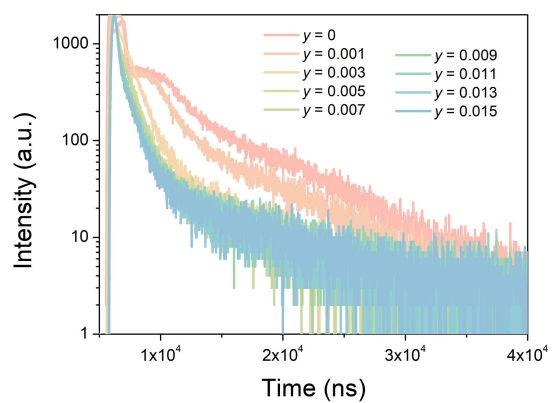

Fig S4. Fluorescence decay curves of  $\text{Sr}_3\text{NaSbO}_6:0.001\text{Bi}^{3+},y\text{Mn}^{4+}$  ( $y = 0 - 1.5$  mol%).

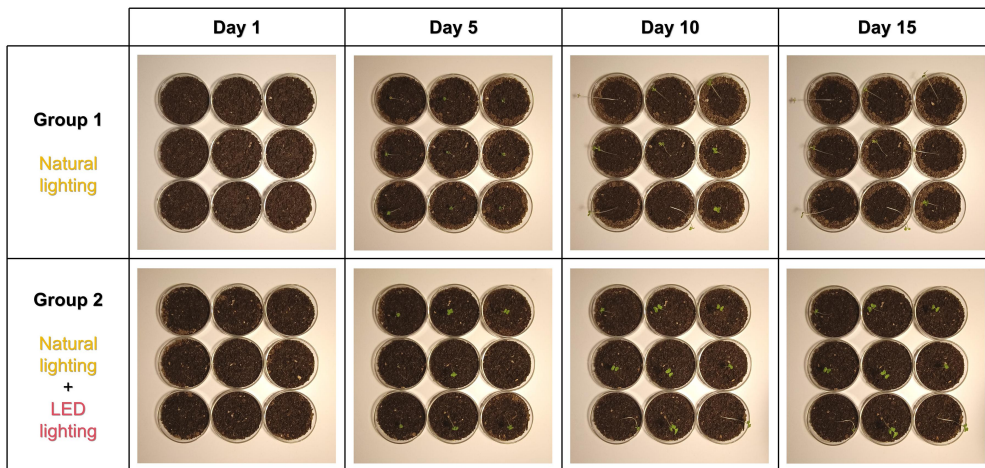

Fig S5. The growth status of mustard plants in Group 1 and Group 2 on days 1, 5, 10, and 15.

Table S1. Refined parameters of Sr<sub>3</sub>NaSbO<sub>6</sub> and Sr<sub>3</sub>NaSbO<sub>6</sub>:0.001Bi,0.007Mn.

| Chemical formula         | Sr <sub>3</sub> NaSbO <sub>6</sub> | Sr <sub>3</sub> NaSbO <sub>6</sub> : |
|--------------------------|------------------------------------|--------------------------------------|
|                          |                                    | 0.001Bi,0.007Mn                      |
| <i>a</i> /Å              | 9.764                              | 9.757                                |
| <i>b</i> /Å              | 9.764                              | 9.757                                |
| <i>c</i> /Å              | 11.600                             | 11.604                               |
| <i>V</i> /Å <sup>3</sup> | 957.848                            | 956.634                              |
| <i>R<sub>p</sub></i> /%  | 11.4                               | 11.5                                 |
| <i>R<sub>wp</sub></i> /% | 14.8                               | 14.6                                 |
| $\chi^2$                 | 1.99                               | 1.74                                 |

Table S2. A comparison of the as-synthesized phosphor with some Mn<sup>4+</sup>-activated red-emitting phosphors.

| No. | Phosphor                                                                            | Emission<br>wavelength / nm | Thermal stability / %                    | $\Delta E$ / eV | $\eta_{\text{QY}}$ / % |
|-----|-------------------------------------------------------------------------------------|-----------------------------|------------------------------------------|-----------------|------------------------|
| 1   | Li <sub>6</sub> SrLa <sub>2</sub> Sb <sub>2</sub> O <sub>12</sub> :Mn <sup>4+</sup> | 705                         | $I_{423\text{K}}/I_{273\text{K}} = 17.0$ | 0.31            | 18.2                   |
| 2   | SrLaMgSbO <sub>6</sub> :Mn <sup>4+</sup>                                            | 705                         | $I_{423\text{K}}/I_{298\text{K}} = 22.5$ | 0.30            | 35.0                   |
| 3   | LaGeSbO <sub>6</sub> :Mn <sup>4+</sup>                                              | 700                         | $I_{423\text{K}}/I_{298\text{K}} = 18.0$ | 0.58            | 37.7                   |
| 4   | Sr <sub>3</sub> NaSbO <sub>6</sub> :Mn <sup>4+</sup>                                | 695                         | $I_{423\text{K}}/I_{298\text{K}} = 39.8$ | 0.35            | 56.2                   |
| 5   | Li <sub>3</sub> Mg <sub>2</sub> SbO <sub>6</sub> :Mn <sup>4+</sup>                  | 651                         | $I_{423\text{K}}/I_{303\text{K}} = 23.6$ | 0.37            | 83.0                   |
| 6   | Ca <sub>2</sub> YSbO <sub>6</sub> :Mn <sup>4+</sup>                                 | 680                         | $I_{423\text{K}}/I_{303\text{K}} = 40.0$ | 0.31            | 62.6                   |
| 7   | Ca <sub>2</sub> LaSbO <sub>6</sub> :Mn <sup>4+</sup>                                | 685                         | $I_{423\text{K}}/I_{298\text{K}} = 17.1$ | 0.35            | 52.2                   |
| 8   | Ba <sub>2</sub> LaSbO <sub>6</sub> :Mn <sup>4+</sup>                                | 678                         | $I_{420\text{K}}/I_{300\text{K}} = 60.6$ | 0.41            | 33.5                   |
| 9   | Ca <sub>2</sub> LuSbO <sub>6</sub> :Mn <sup>4+</sup>                                | 683                         | $I_{423\text{K}}/I_{303\text{K}} = 48.0$ | 0.25            | 39.1                   |
| 10  | Li <sub>4</sub> AlSbO <sub>6</sub> :Mn <sup>4+</sup>                                | 673                         | $I_{423\text{K}}/I_{298\text{K}} = 15.1$ | 0.52            | 40.0                   |
| 11  | Mg <sub>2</sub> InSbO <sub>6</sub> :Mn <sup>4+</sup>                                | 665                         | $I_{423\text{K}}/I_{303\text{K}} = 36.0$ | 0.27            | 16.3                   |
| 12  | Ca <sub>2</sub> InSbO <sub>6</sub> :Mn <sup>4+</sup>                                | 693                         | $I_{423\text{K}}/I_{298\text{K}} = 59.0$ | -               | 18.0                   |
| 13  | Sr <sub>2</sub> InSbO <sub>6</sub> :Mn <sup>4+</sup>                                | 699                         | $I_{423\text{K}}/I_{298\text{K}} = 37.5$ | -               | 55.9                   |
| 14  | Sr <sub>3</sub> NaSbO <sub>6</sub> :Bi <sup>3+</sup> ,Mn <sup>4+</sup>              | 692                         | $I_{423\text{K}}/I_{298\text{K}} = 48.2$ | 0.36            | 76.1                   |
